# Supplementary material for: MatAR: dynamic augmented reality platform for accessible molecular visualization
Source: Royal Society of Chemistry journal article supplement (doi:10.1039/d3cp02435k), 2023-01-01

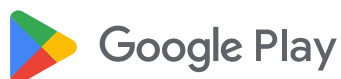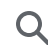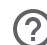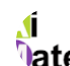

Games

Apps

Movies

Books

Kids

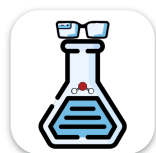

## MatAR

AIMATER

1+

Downloads

3+

Rated for 3+ ⓘ

Install

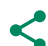

Share

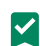

Remove from wishlist

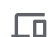

This app is available for your device

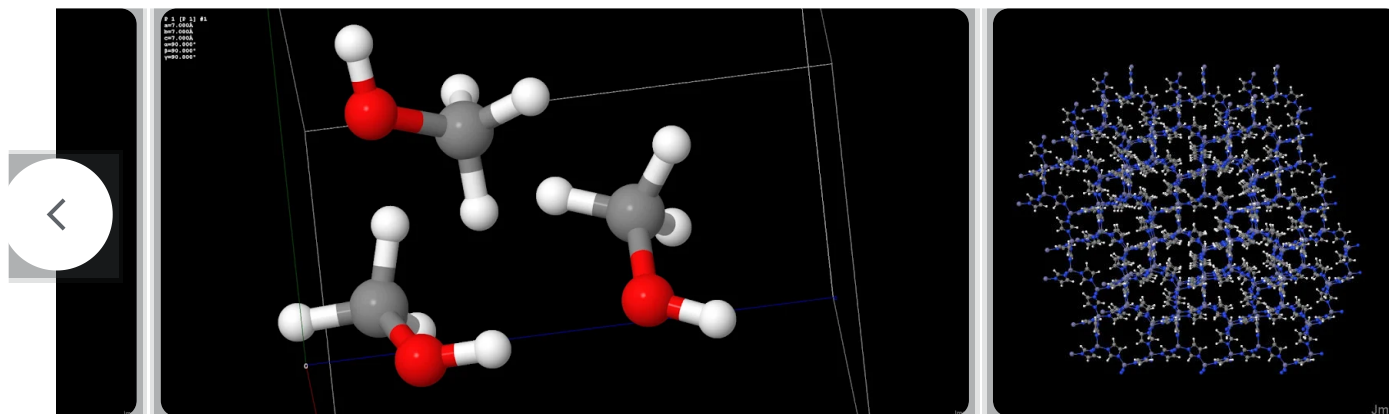

### About this app

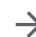

MatAR is an educational AR app designed to enhance accessibility for colorblind learners and support sustainable and inclusive STEM education. With the potential to visualize 3D molecular structures and provide immersive solutions for education and research, MatAR is an important step towards promoting lifelong learning opportunities for all and achieving the UN's Sustainable Development Goals.

Updated on

May 21, 2023

Education



Google Play



GamesAppsMoviesBooksKids

update it over time.



No data shared with third parties  
[Learn more](#) about how developers declare sharing



No data collected  
[Learn more](#) about how developers declare collection

[See details](#)

What's new

Initial Release

App support

 **Support email**  
aimater40@gmail.com

 **Privacy Policy**

Similar apps



Turito- Live Learning App  
Turito Inc  
3.4 ★



Interval Timer  
Markus Hollitsch  
4.2 ★



Heroic | The Training Platform  
Heroic Enterprises, PBC  
4.4 ★



Outlit  
Outlit



The Myriad  
The Myriad



Send to Kindle by KTool  
Podzim LLC  
2.0 ★

 **Flag as inappropriate**

- Google Play
- Play Pass
- Play Points

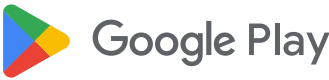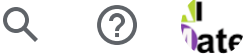

Games   **Apps**   Movies   Books   Kids

Kids & family

Parent Guide

Family sharing

Terms of Service   Privacy   About Google Play   Developers   Google Store   Qatar (English)

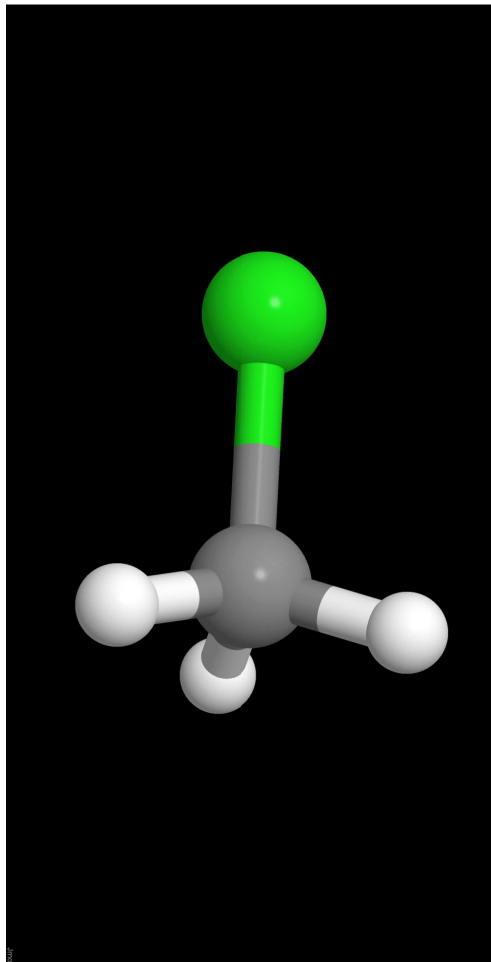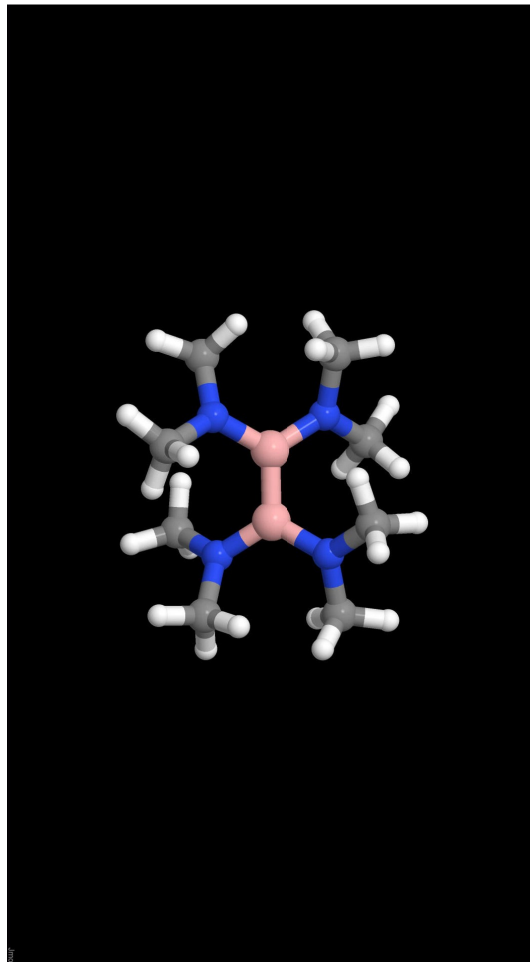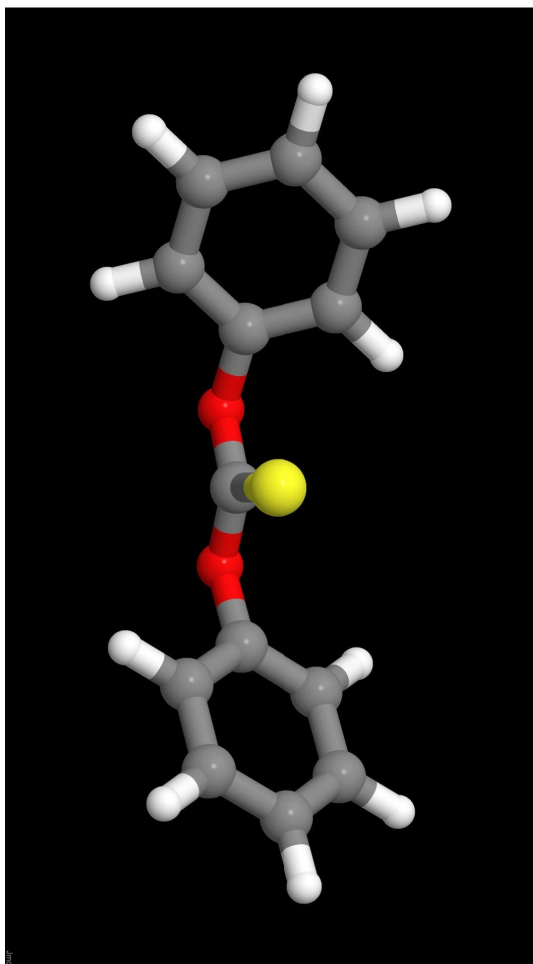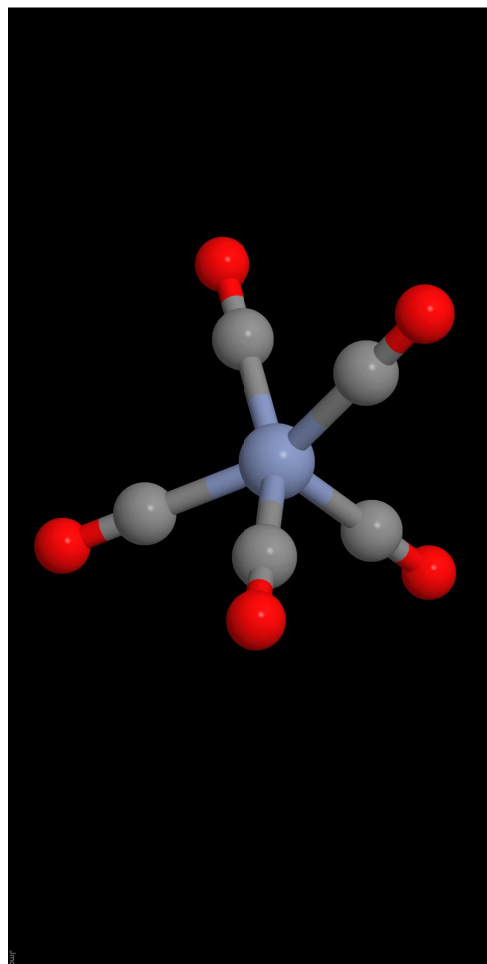

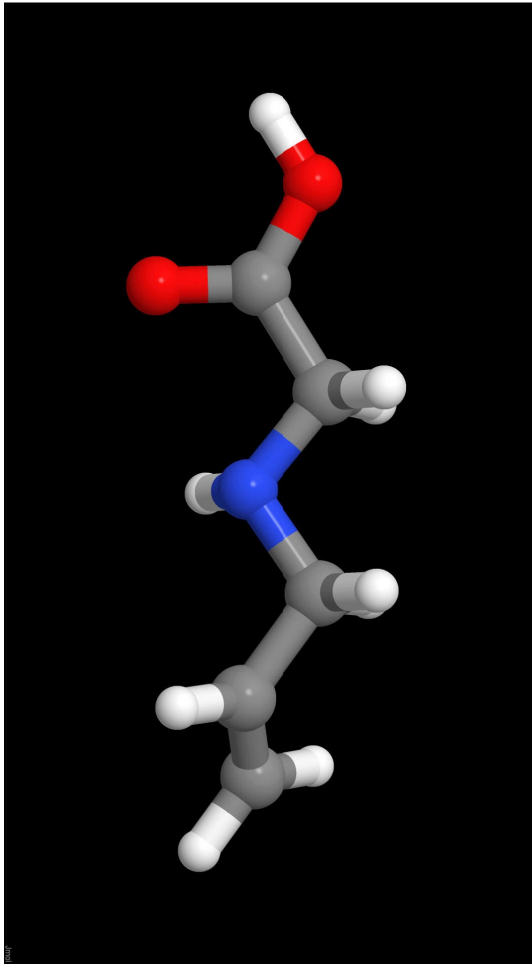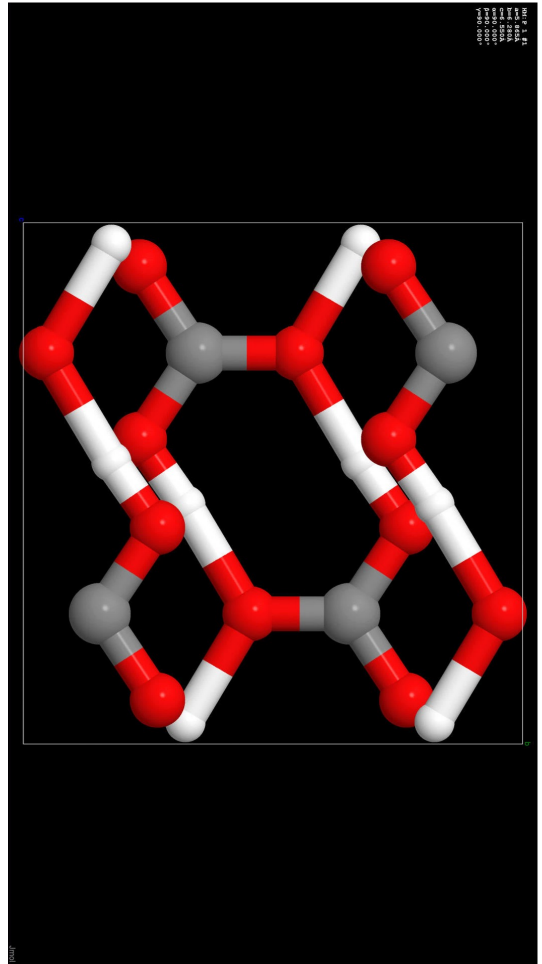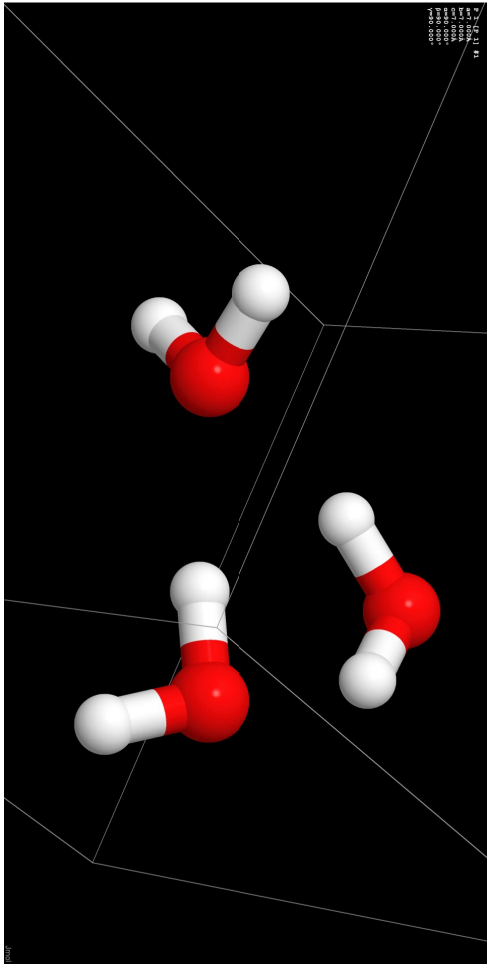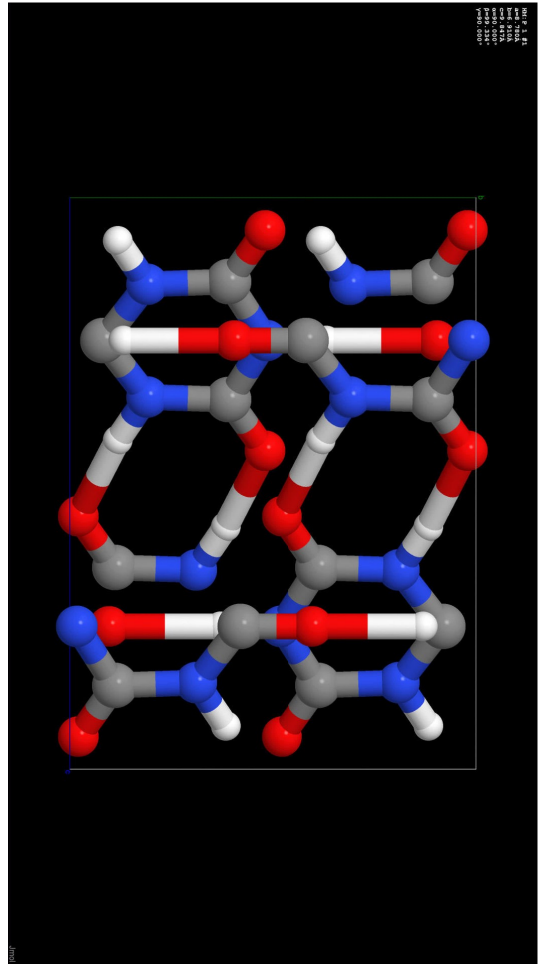





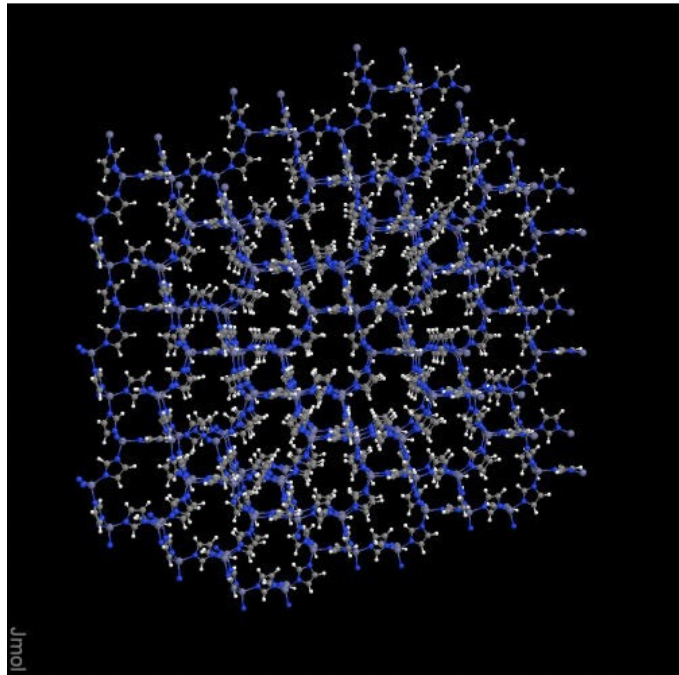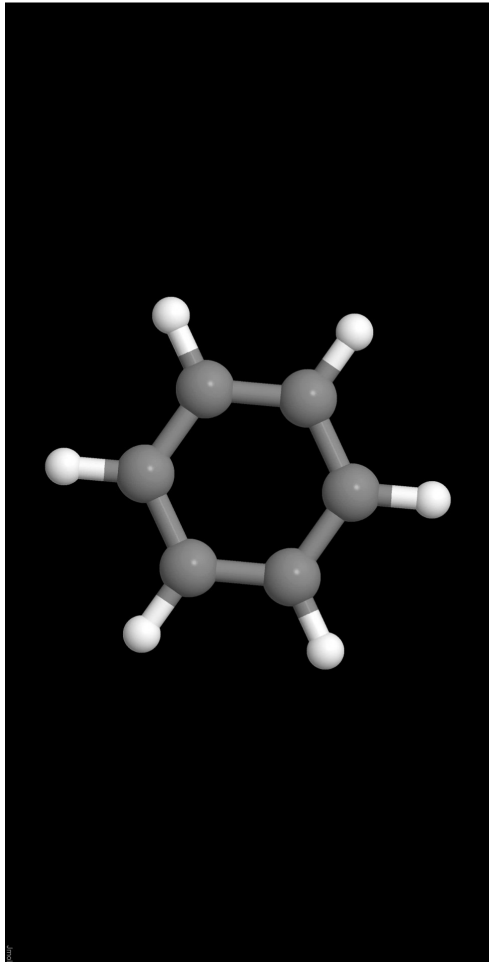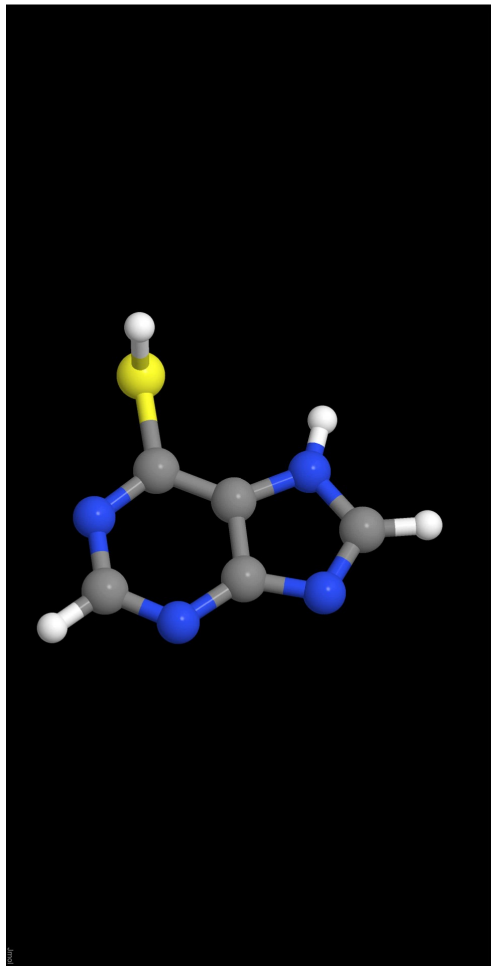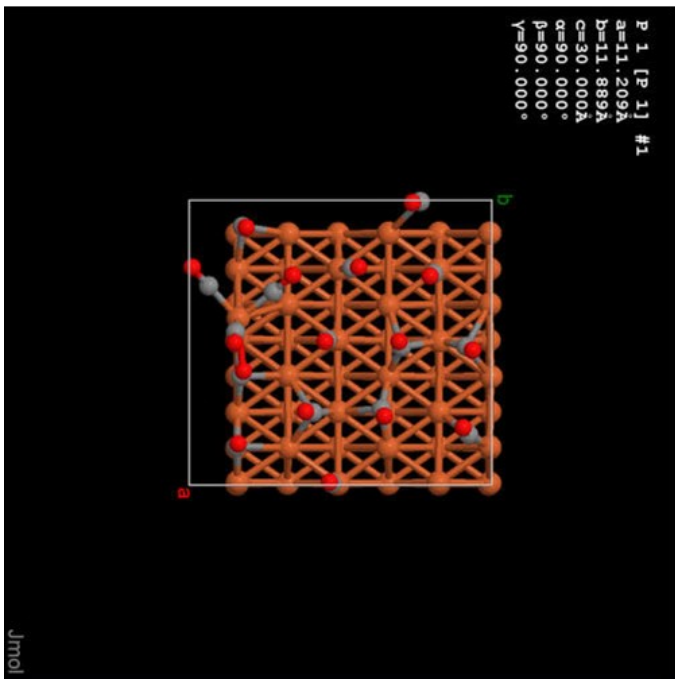



## Learning how to use the MatAR application was easy.

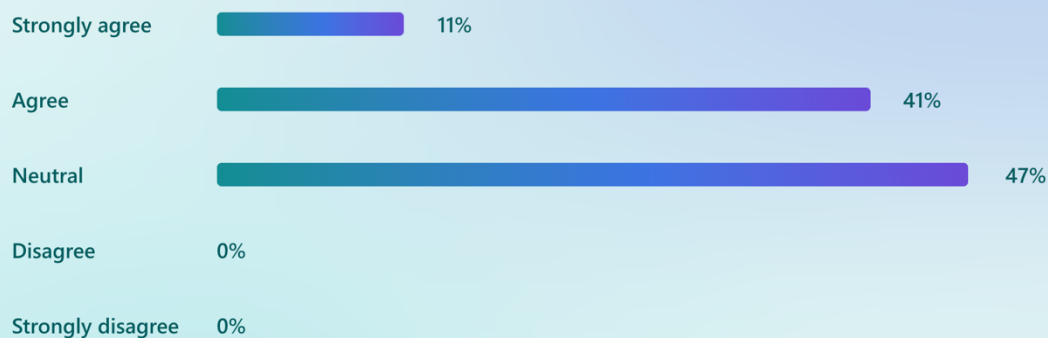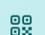

Treemap

Bar

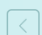

1 of 23

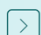

## Using the MatAR application for 3D view and interacting with molecules and systems of various sizes was practical and easy

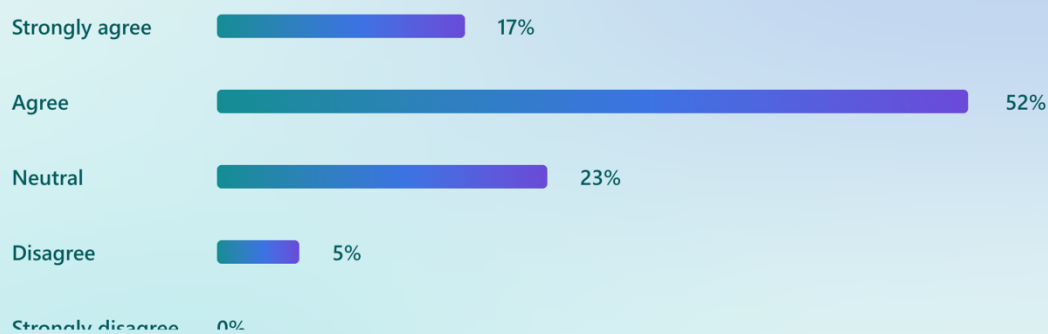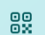

Treemap

Bar

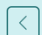

2 of 23

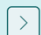

## I was able to change the coloring of the molecules by navigating the color palette

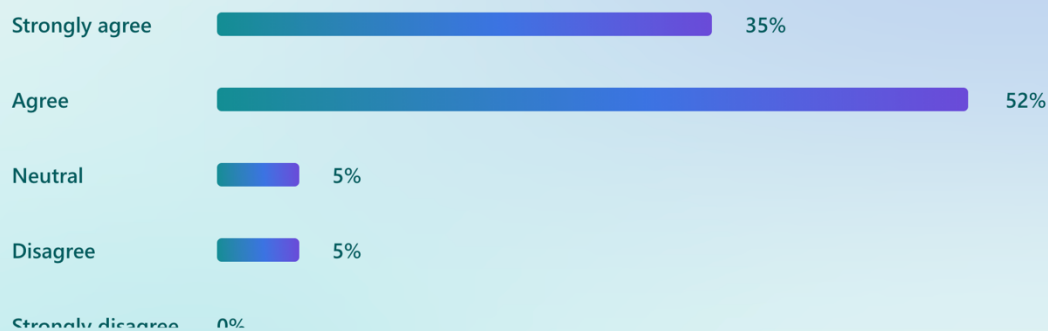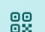

Treemap

Bar

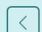

3 of 23

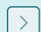

### Having the option to use the color palette that suits my vision made the application more accessible

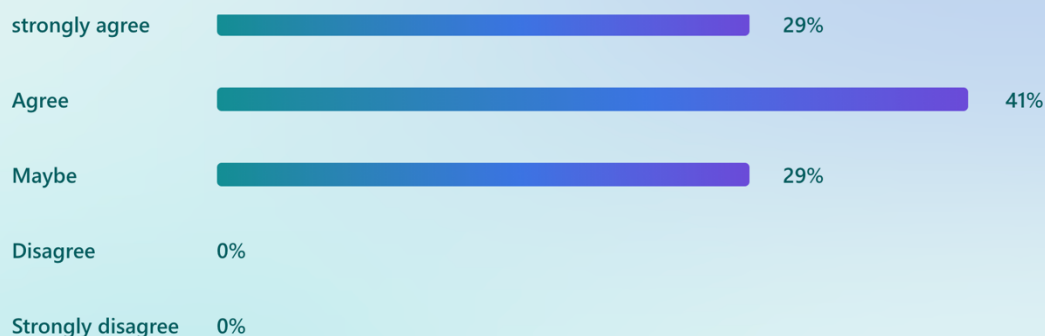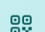

Treemap

Bar

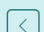

4 of 23

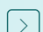

### Using the MatAR application, I was able to observe 3-D objects from various perspectives easily.

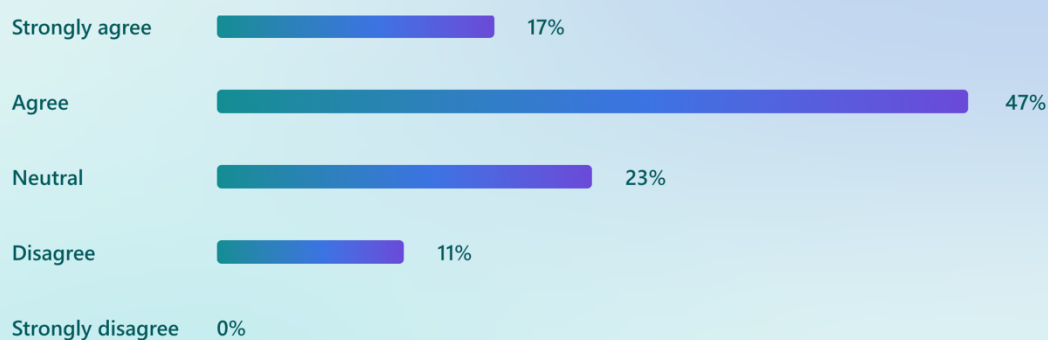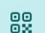

Treemap

Bar

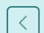

5 of 23

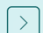

### Using the MatAR application, I was able to rotate 3-D molecules easily.

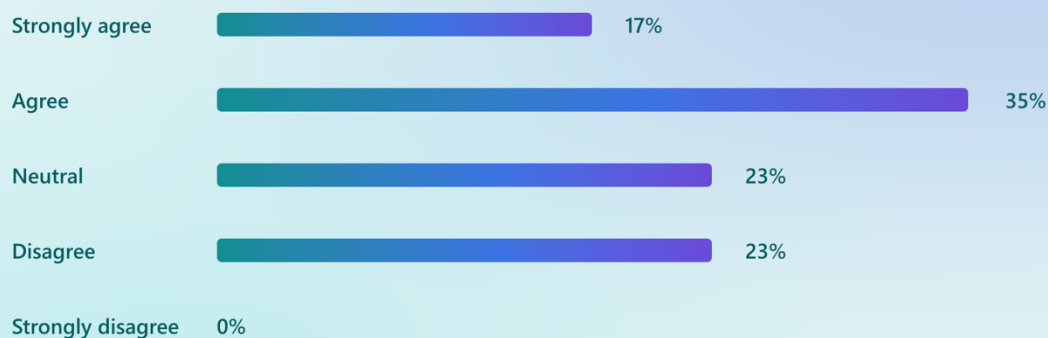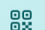

Treemap

Bar

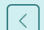

6 of 23

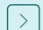

Using the MatAR application, I was able to Zoom in and Zoom out 3-D molecules easily.

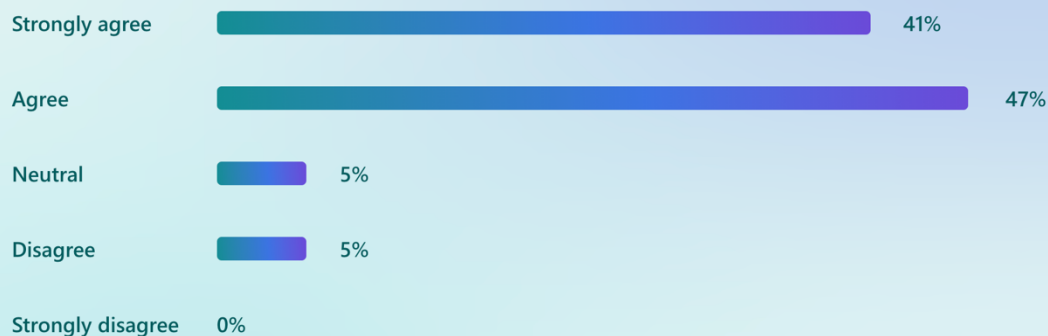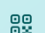

Treemap

Bar

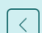

7 of 23

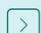

The MatAR application created a realistic-looking learning environment.

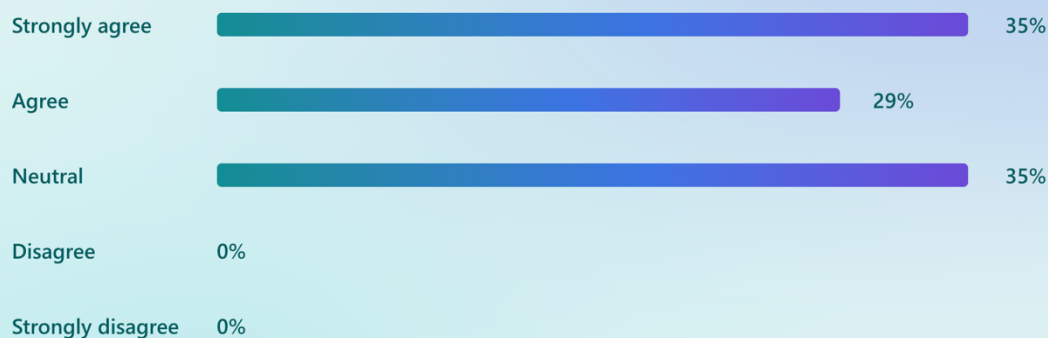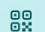

Treemap

Bar

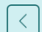

8 of 23

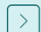

I paid more attention when using 3-D molecules.

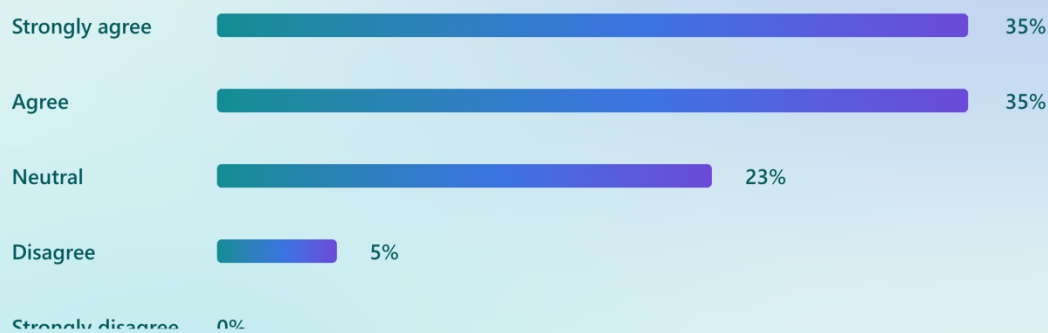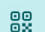

Treemap

Bar

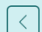

9 of 23

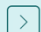

### I felt immersed in the 3-D Molecules Augmented Reality experience.

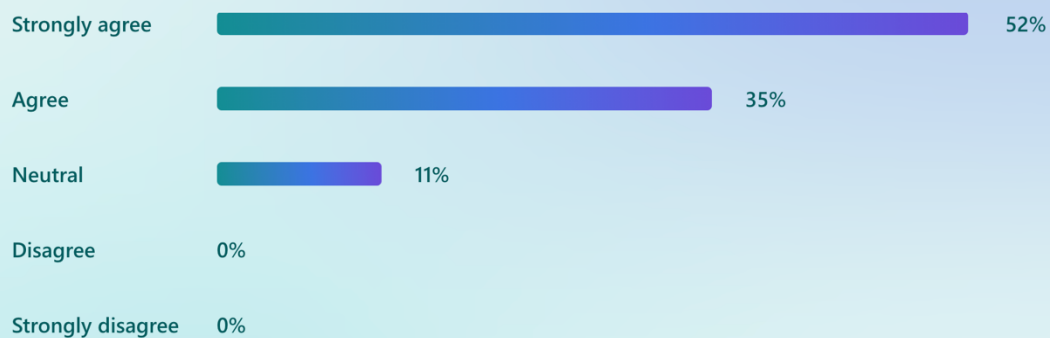

Treemap

Bar

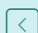

10 of 23

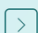

### I feel that using Augmented Reality to visualize the 3-D molecules is impressive

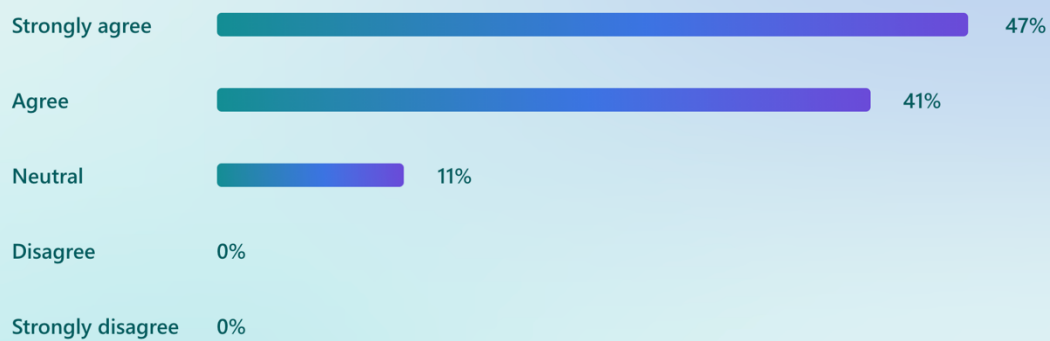

Treemap

Bar

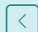

11 of 23

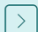

### The MatAR application can enhance my learning interest

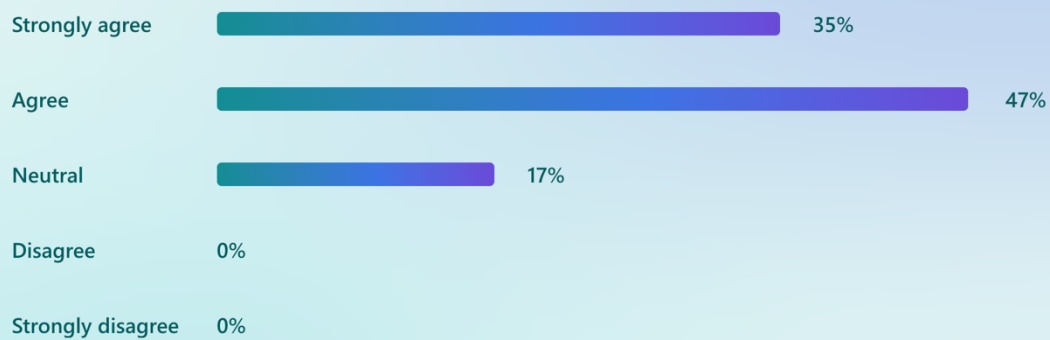

Treemap

Bar

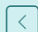

12 of 23

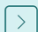

### The MatAR application can enhance my learning motivation for chemistry

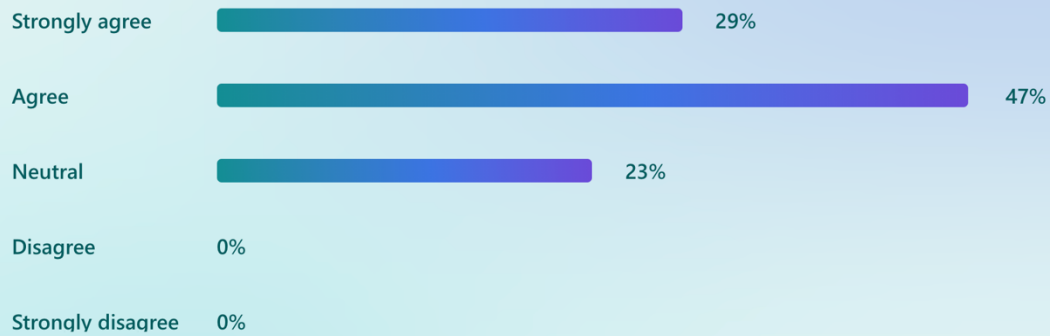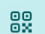

Treemap

Bar

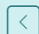

13 of 23

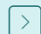

### I think MatAR can strengthen my intentions to learn Science

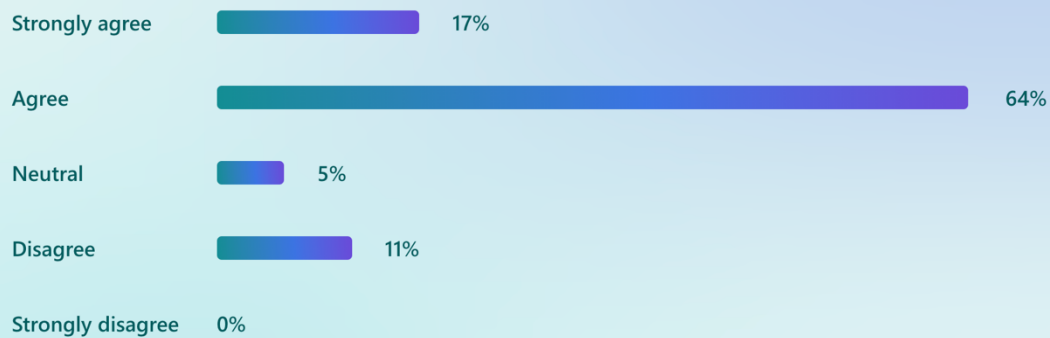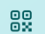

Treemap

Bar

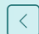

14 of 23

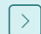

### I am willing to use Augmented Reality for learning in the future

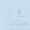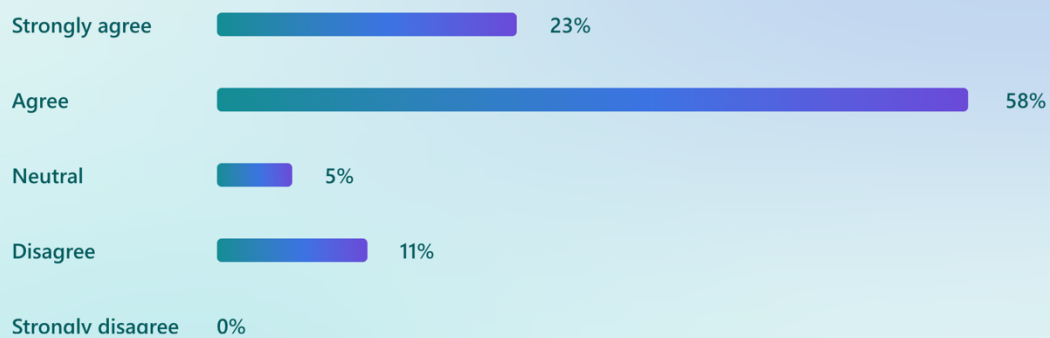

Treemap

Bar

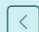

15 of 23

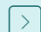

I wish that teachers adopt Augmented Reality technology to facilitate my learning of chemistry.

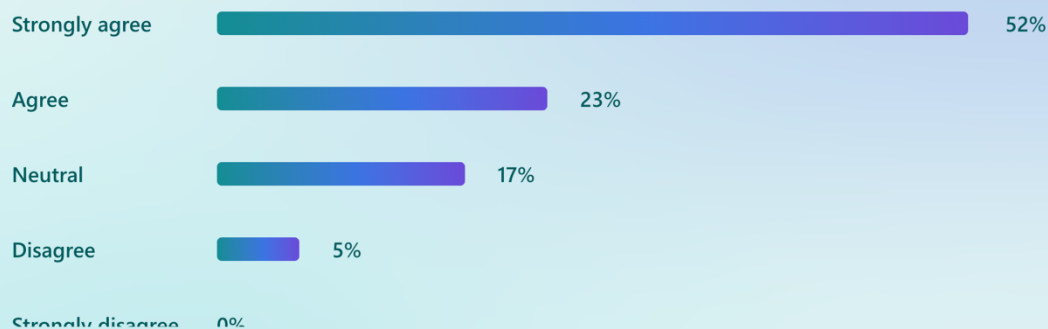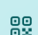

Treemap

Bar

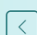

16 of 23

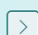

Overall, I think that the MatAR application can become a good learning tool for other sciences

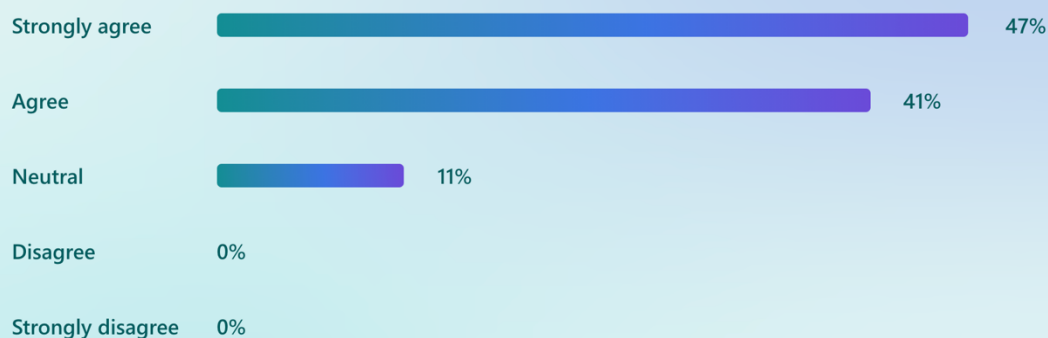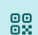

Treemap

Bar

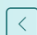

17 of 23

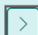

Describe how you felt right before the Augmented Reality experience.

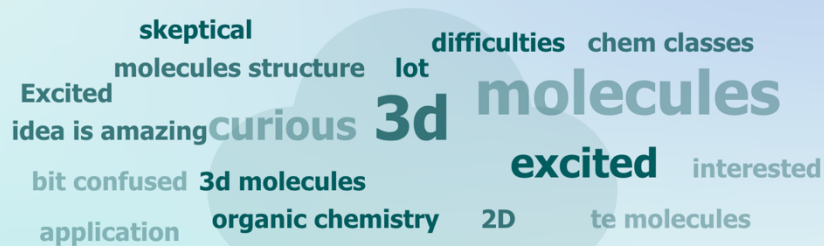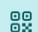

Wordcloud

All responses

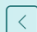

18 of 23

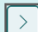

Describe how you felt during the Augmented Reality experience.

Android phone choice fast recognition worked perfectly  
lot different colors 3d shape  
different angles **molecule** **amazed**  
organic chemistry App atoms  
recognition of the molecule image  
idea is amazing ability impressive features amazed by the technology  
chem classes



Wordcloud

All responses

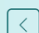

19 of 23

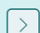

Describe how you felt right after the Augmented Reality experience.

skeletal structures fun and excited symbol of the atoms  
idea is amazing molecules lot better Application bit unstable  
amazing structures fun molecule structure  
organic chemistry interest 3D molecules  
newer students especially for learning chemistry courses  
chirality and chair color gradient



Wordcloud

All responses

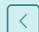

20 of 23

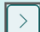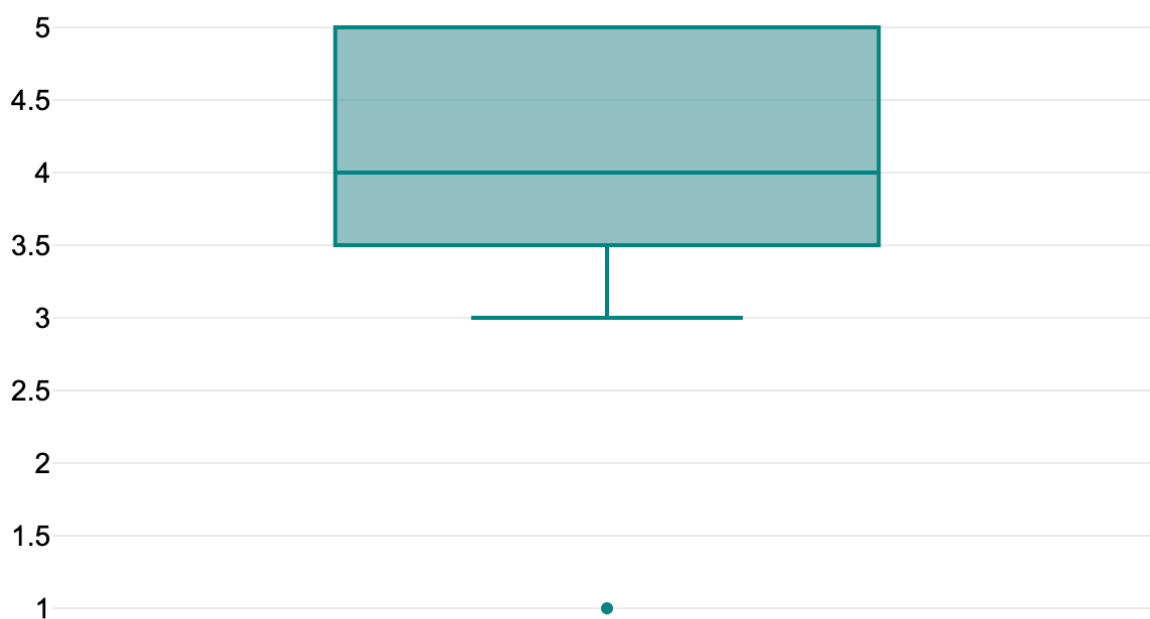

How would you rate the user experience from the MatAR App?

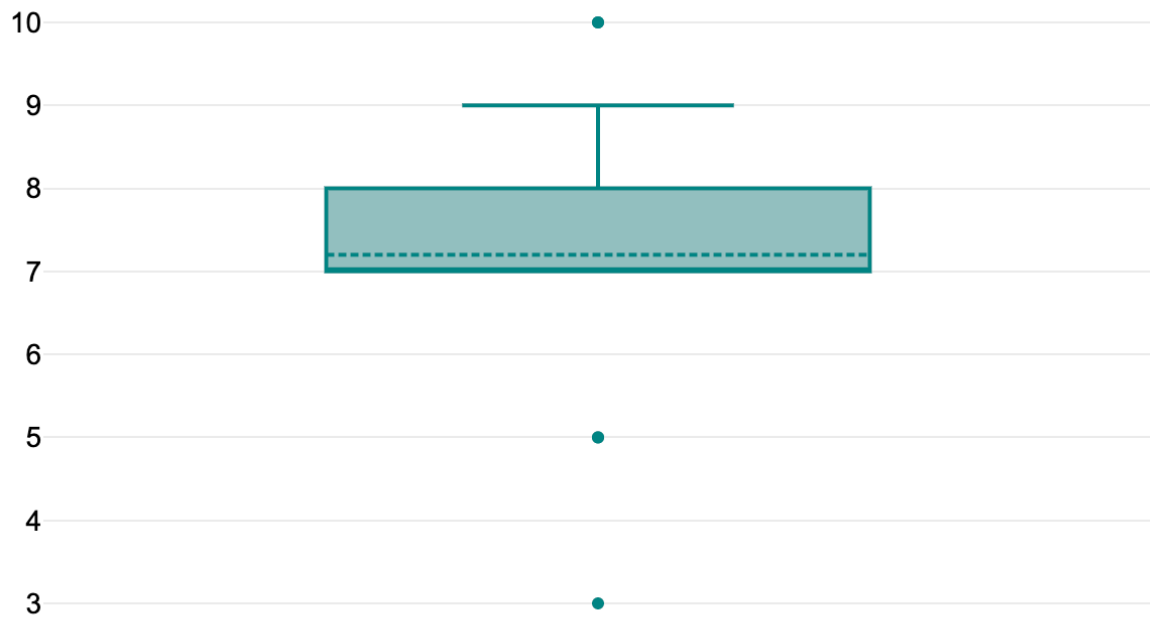

How likely are you to recommend us to a friend or colleague?

Do you think this platform can be useful to speed up or enhance your outcomes?

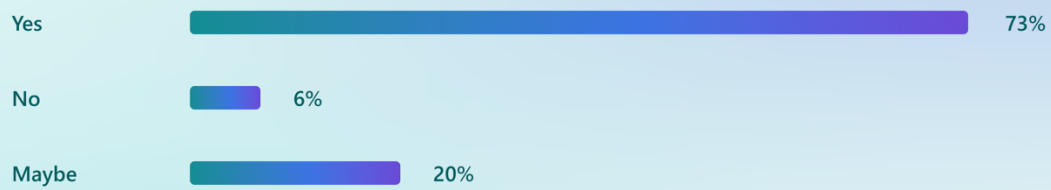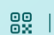

Treemap

Bar

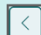

22 of 23

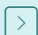

Supplement: d3cp02435k1.pdf [file d3cp02435k1.pdf]
